# Supplementary material for: Rapid assessment of crystal orientation in semi-crystalline polymer films using rotational zone annealing and impact of orientation on mechanical properties
Source: Royal Society of Chemistry journal article supplement (doi:10.1039/c7sm01366c), 2017-01-01
Supplement: c7sm01366c1.pdf [file c7sm01366c1.pdf]

## Electronic Supplementary Information for:

### **Rapid Assessment of Crystal Orientation in Semi-Crystalline Polymer Films using Rotational Zone Annealing and Impact of Orientation on Mechanical Properties**

Changhuai Ye,<sup>†</sup> Chao Wang,<sup>†</sup> Jing Wang,<sup>‡</sup> Clinton G. Wiener,<sup>†</sup> Xuhui Xia,<sup>†</sup> Stephen Z.D. Cheng,<sup>‡</sup> Ruipeng Li,<sup>§</sup> Kevin G. Yager,<sup>⊥</sup> Masafumi Fukuto,<sup>§</sup> and Bryan D. Vogt<sup>†,\*</sup>

<sup>†</sup> Department of Polymer Science, University of Akron, Akron, OH 44325

<sup>‡</sup> Department of Polymer Engineering, University of Akron, Akron, OH 44325

<sup>§</sup> National Synchrotron Light Source II, Brookhaven National Laboratory, Upton, New York 11973, USA

<sup>⊥</sup> Center for Functional Nanomaterials, Brookhaven National Laboratory, Upton, New York 11973, USA

---

\* To whom correspondence should be addressed: vogt@uakron.edu

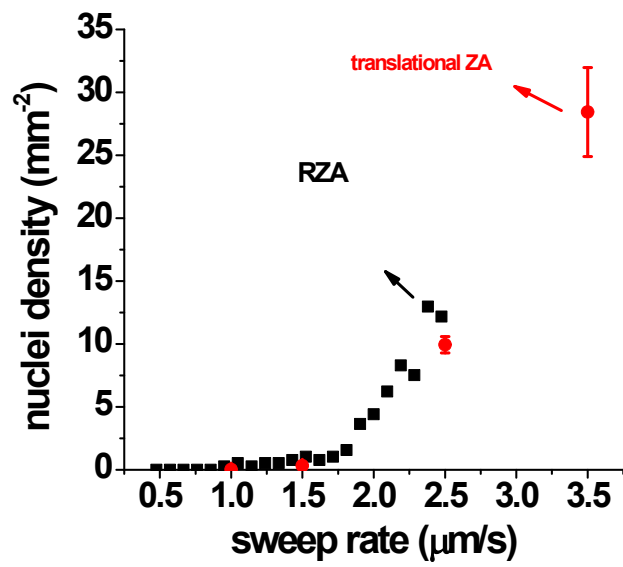

**Figure S1.** Nuclei density of PB-1 films using RZA and translational ZA at varied sweep rate.

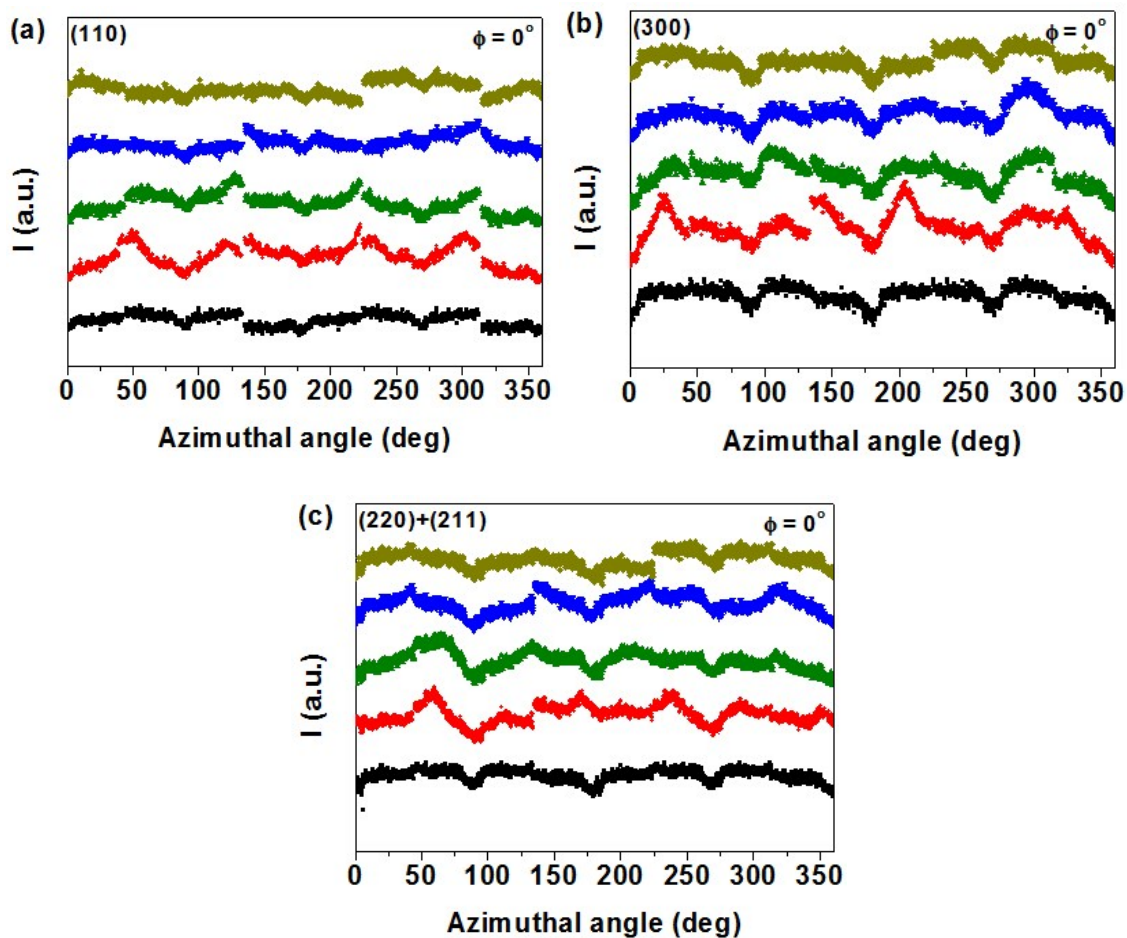

**Figure S2.** Azimuthal scattering intensity using 13.5 keV X-rays of (a) (110) plane, (b) (300) plane and (c) (220) + (211) plane for PB-1 films using isothermal crystallization and ZA with sweep rates of 1.0 (●), 1.5 (▲), 2.5 (▼) and 3.5 (◆)  $\mu\text{m/s}$  at an incident angle  $\phi = 0^\circ$ . An azimuthal angle of  $0^\circ$  refers to the direction  $90^\circ$  clockwise to the zone annealing direction.

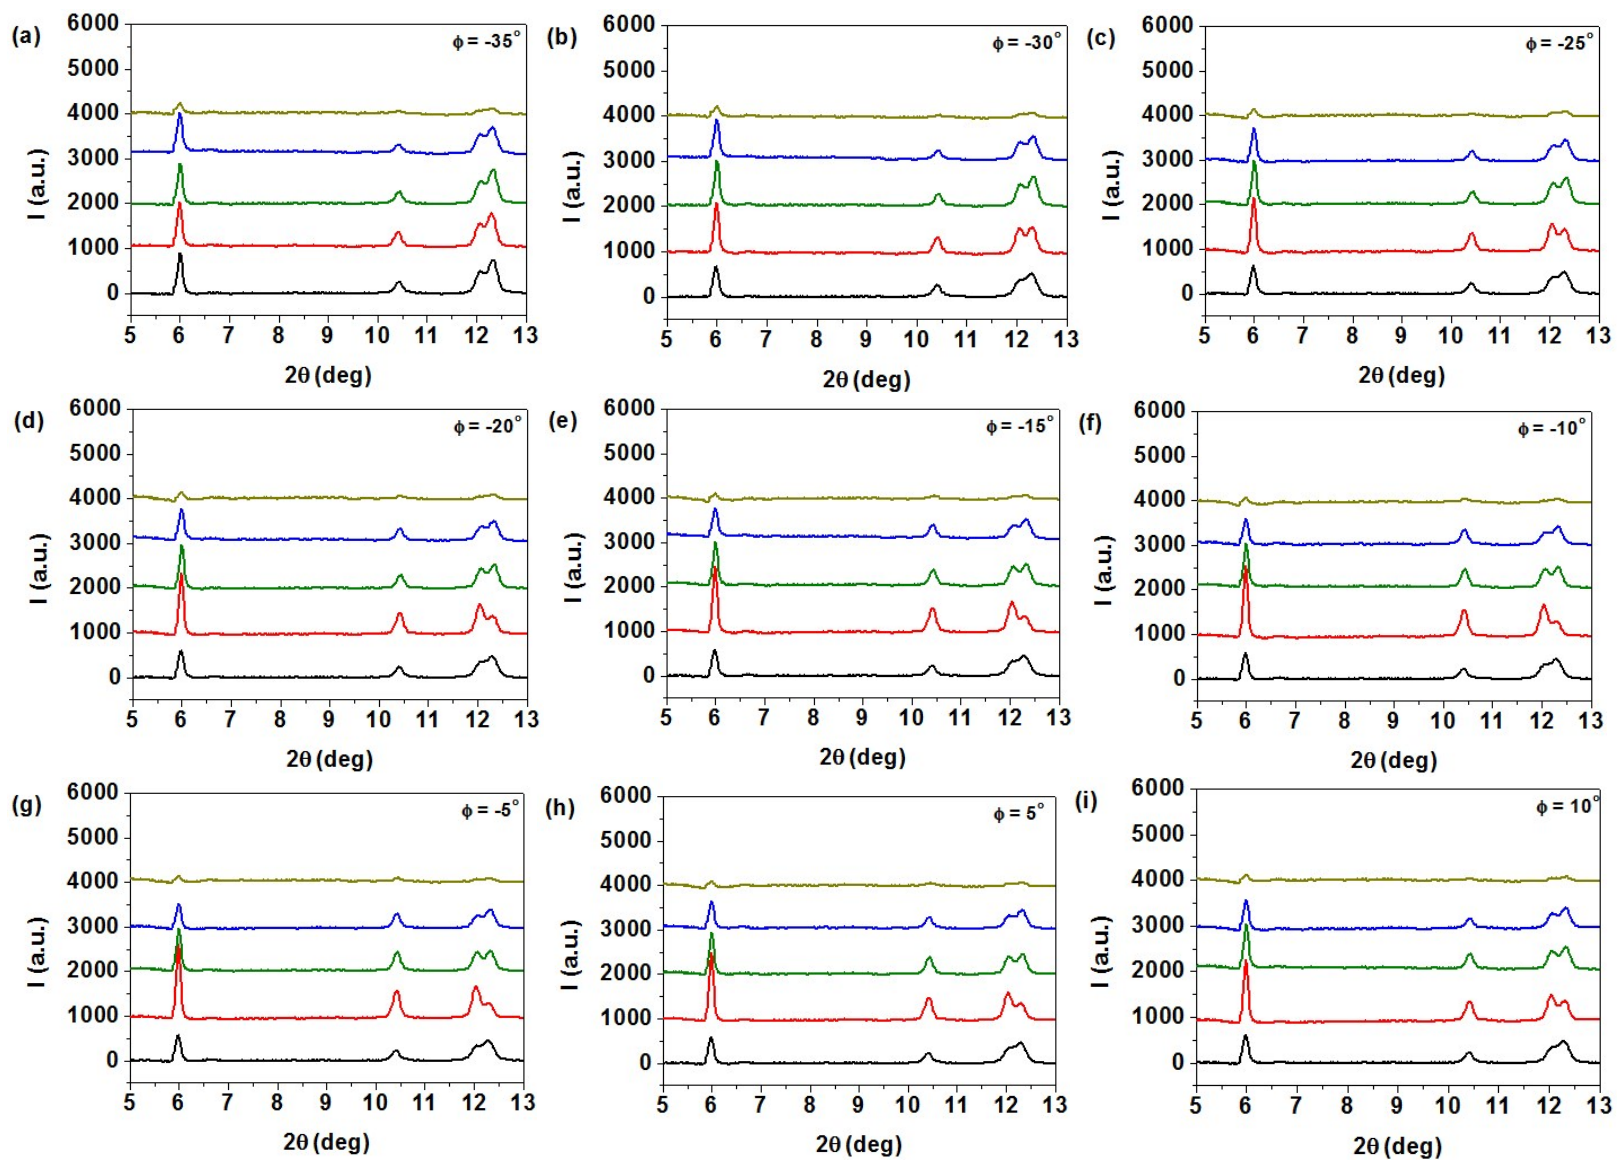

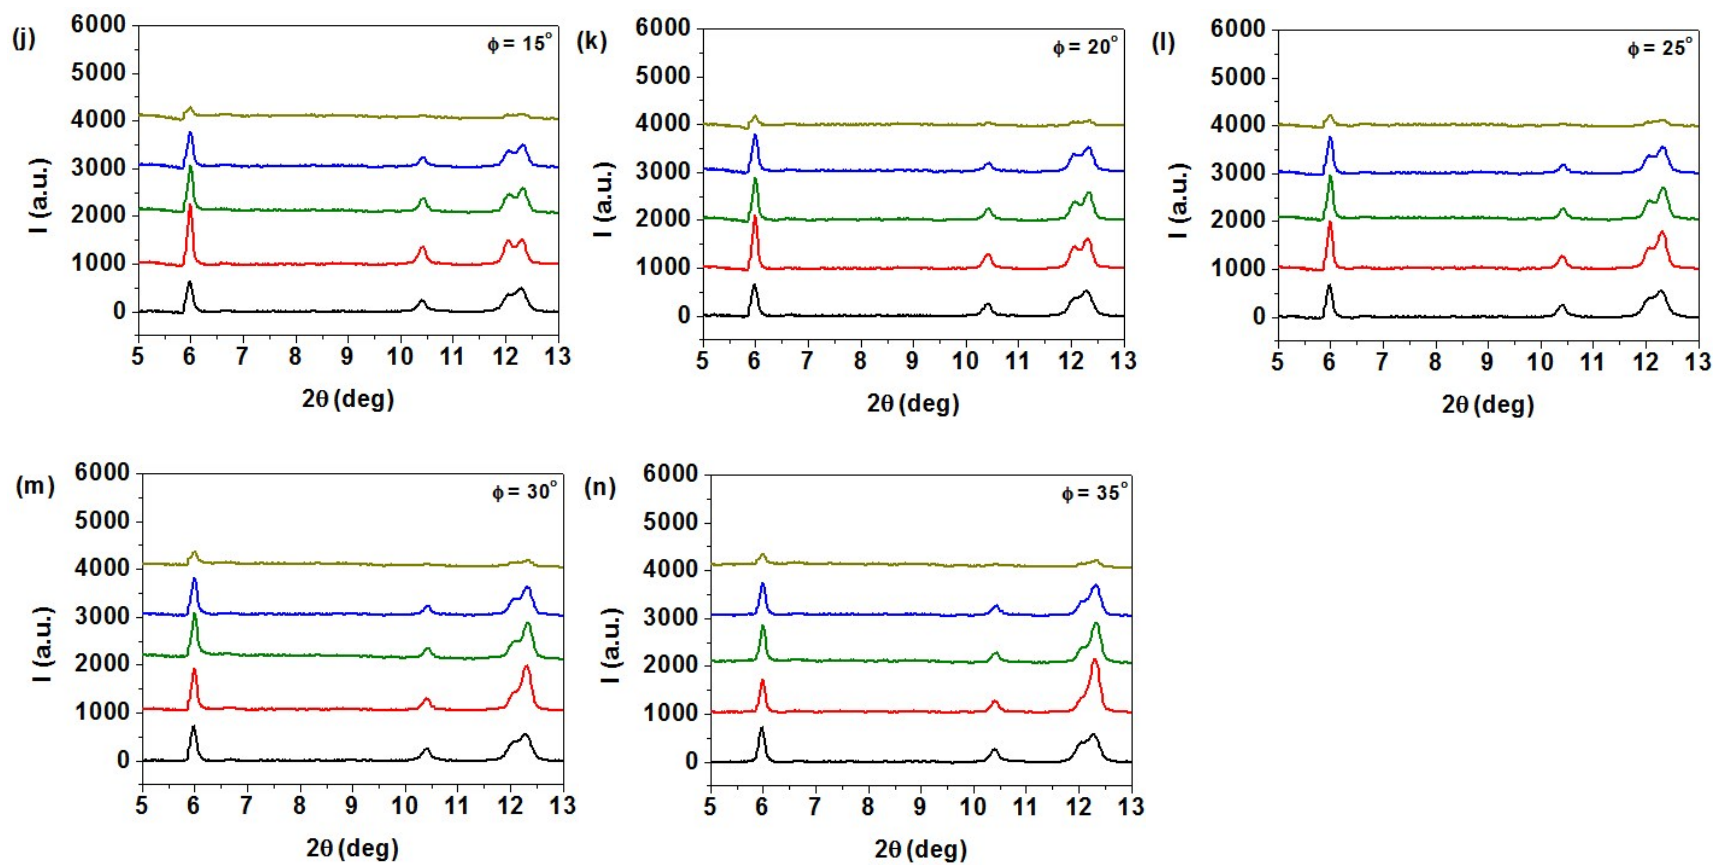

**Figure S3.** WAXD patterns using 13.5 keV X-rays at incident angles  $\phi$  from  $-35^\circ$  to  $35^\circ$  of PB-1 films using isothermal crystallization (black) and ZA with  $V_{ZA} = 1.0$  (red), 1.5 (green), 2.5 (blue) and 3.5 (yellow)  $\mu\text{m/s}$  after  $\sim 600$  days of aging at room temperature. The diffraction patterns were vertically shifted to improve clarity.

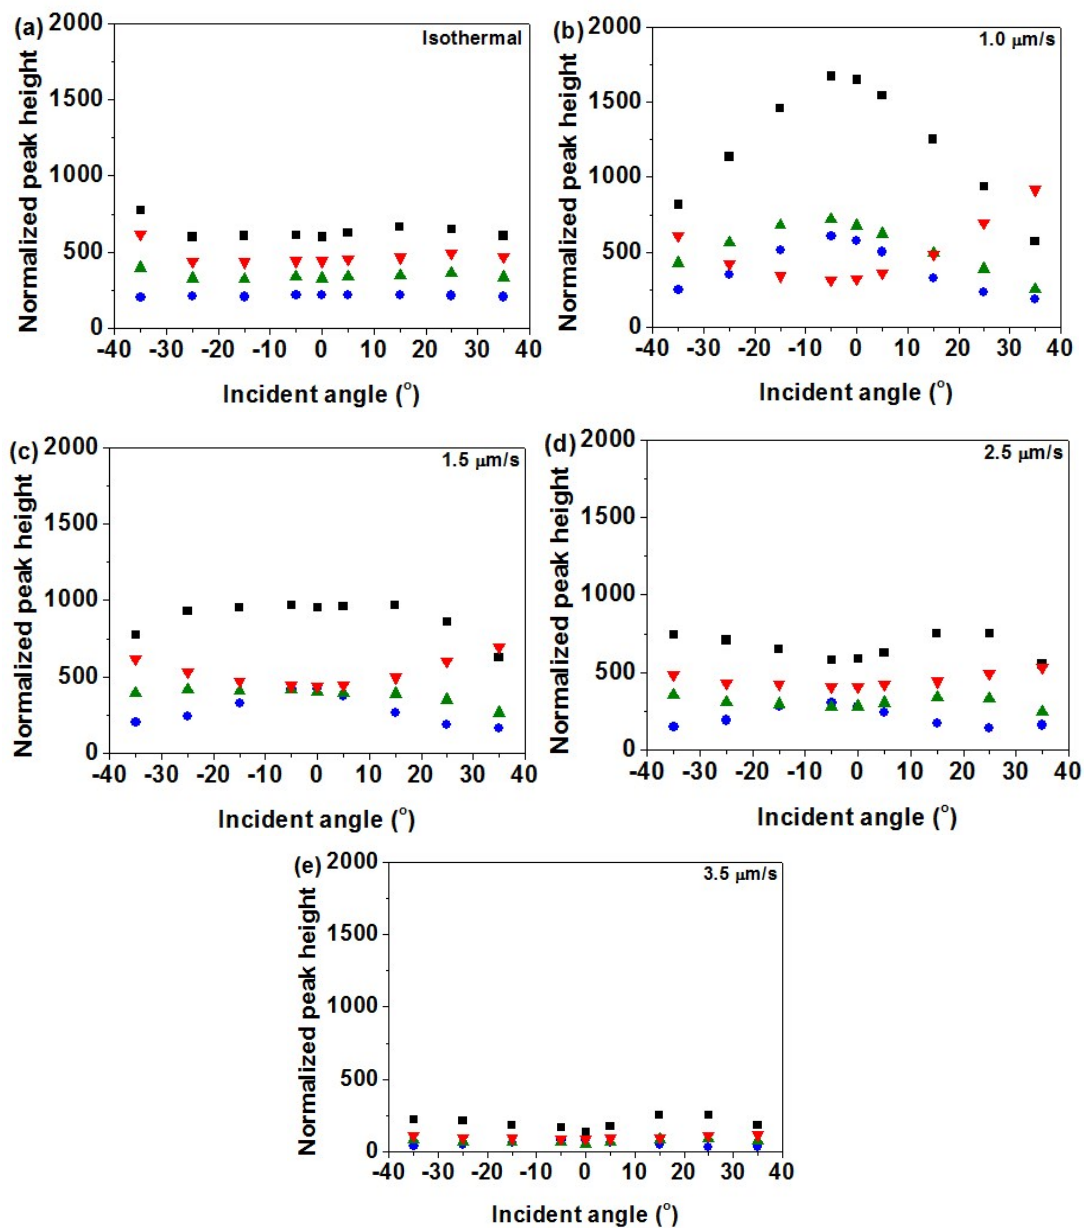

**Figure S4.** The relative intensities of the diffraction peaks associate with the crystallographic planes of (110) (■), (300) (●), (220) (▲) and (211) (▼) at different incident angles for PB-1 films processed by (a) isothermal crystallization, and ZA with  $V_{ZA}$  = (b) 1.0 μm/s (c) 1.5 μm/s (d) 2.5 μm/s and (e) 3.5 μm/s.



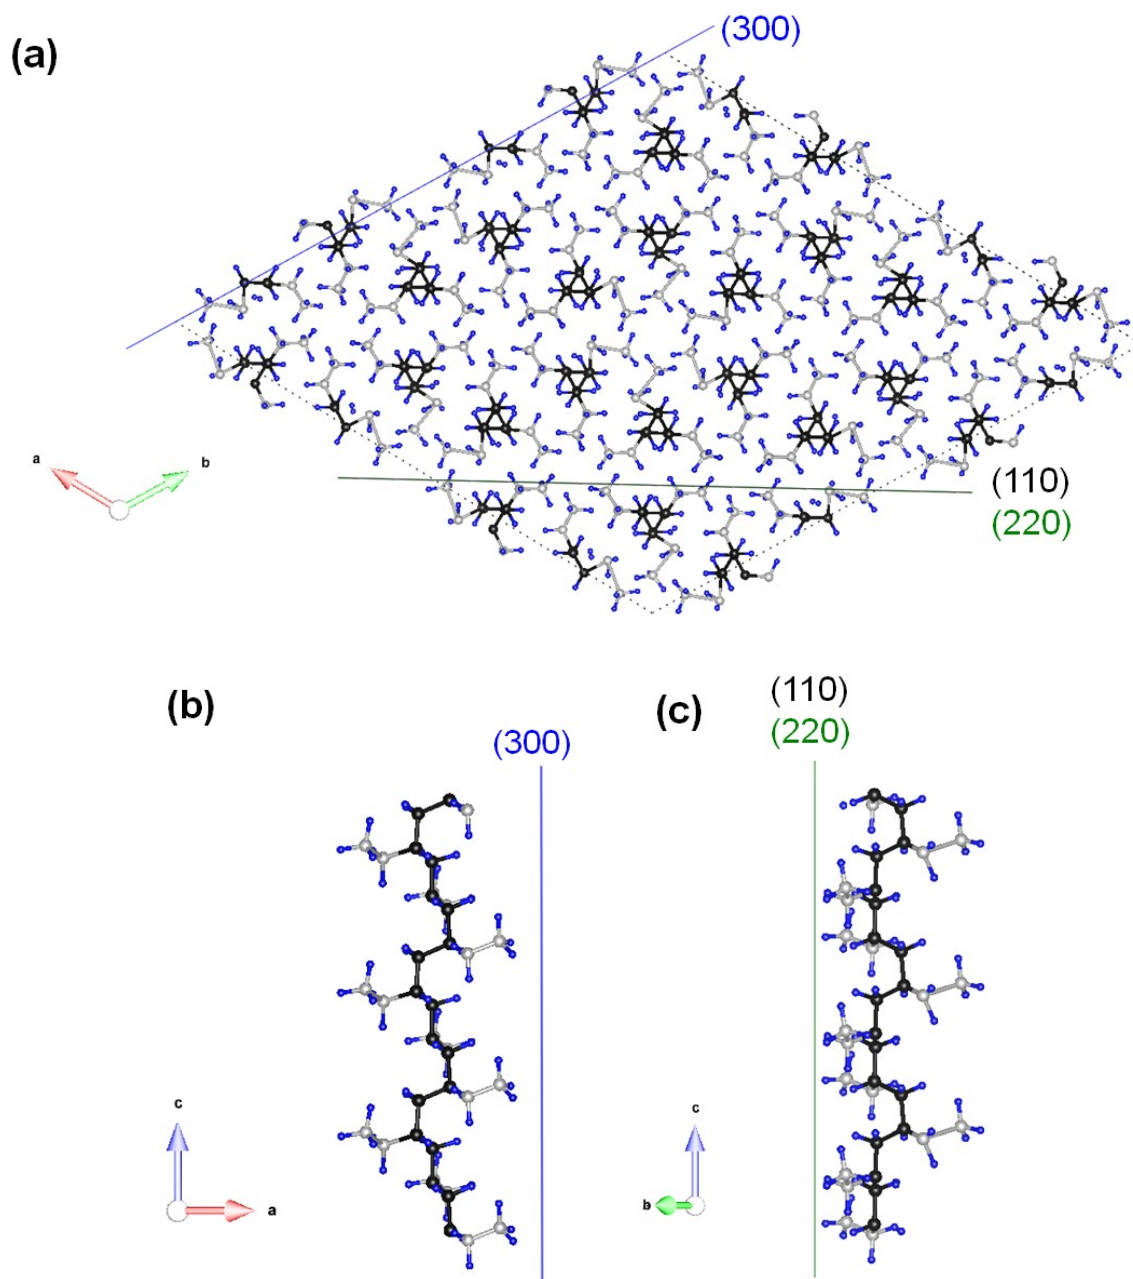

**Figure S5.** Schematic of the crystal structure of PB-1. The carbon atoms in the backbone are in black, the carbon atoms in the side chain are in silver, while the hydrogen atoms are in blue. The backbone of PB-1 is parallel to (110), (300) and (220) planes.

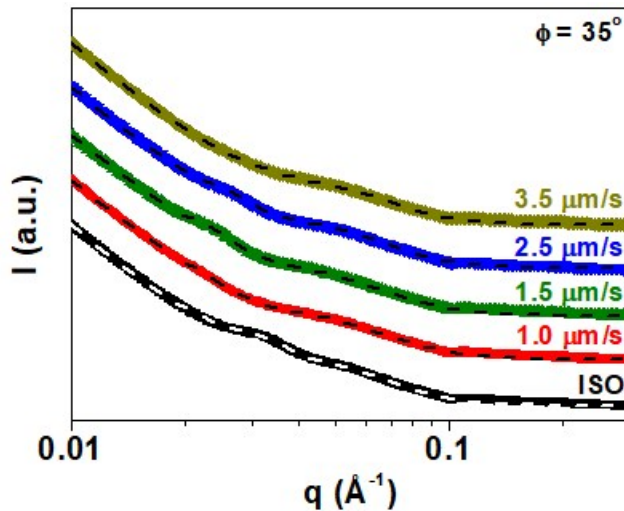

**Figure S6.** SAXS patterns using 13.5 keV X-rays of PB-1 films processed by isothermal crystallization (ISO, ■) and ZA with  $V_{ZA} = 1.0$  (●), 1.5 (▲), 2.5 (▼) and 3.5 (◆)  $\mu\text{m/s}$  at  $\phi = 35^\circ$ . The dashed lines are the fitted curves. The scattering patterns were vertically shifted to improve clarity.

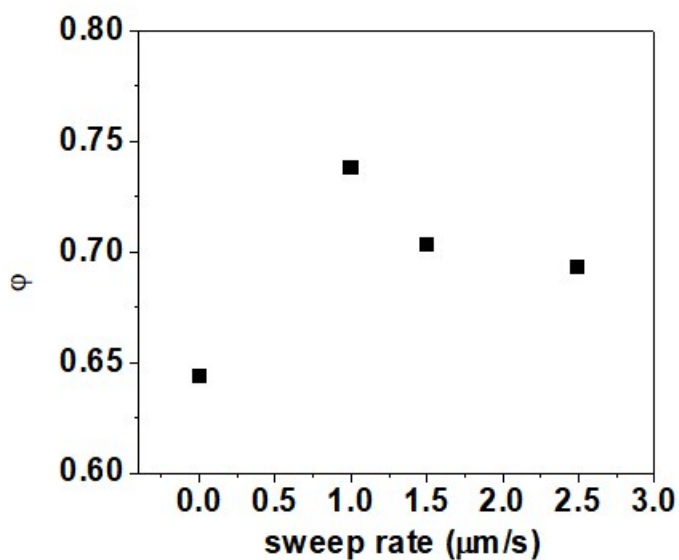

**Figure S7.** The crystallinity of the stacked lamellae ( $\phi$  of PB-1 for isothermal crystallization and ZA with different  $V_{ZA}$ . For the isothermal crystallization,  $V_{ZA} = 0$ .



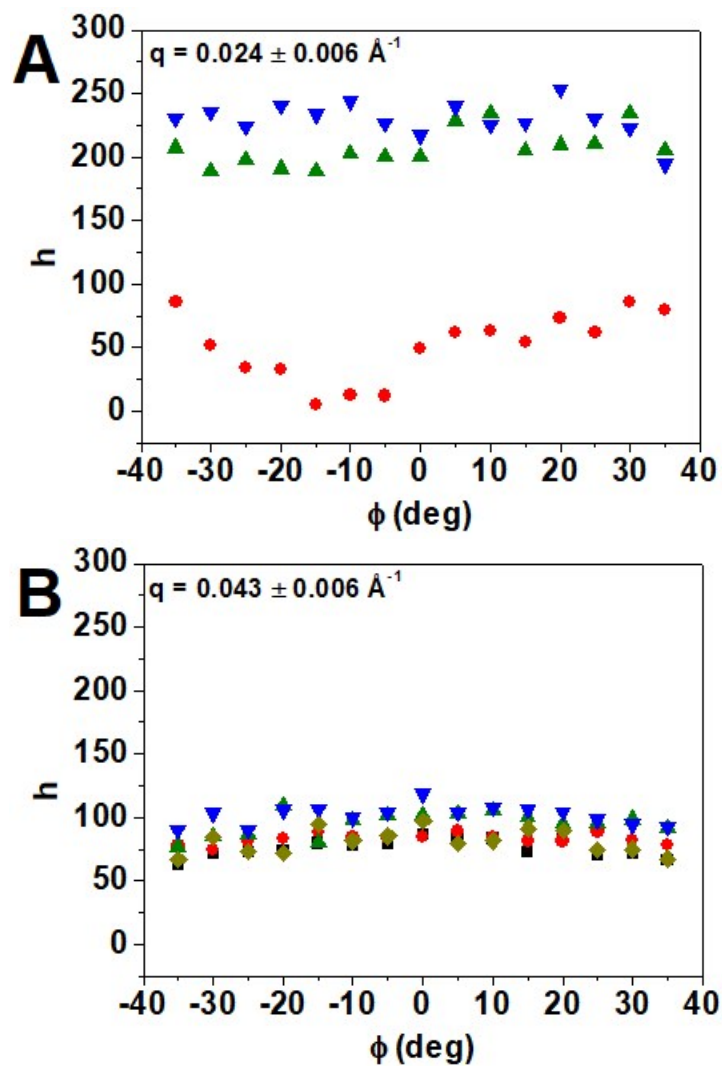

**Figure S8.** The maximum of the azimuthal angle dependence of the scattered intensity intensities near the shoulders at (A)  $q = 0.024$  and (B)  $q = 0.043$  at different incident angles ( $\phi$ ) for PB-1 films processed by isothermal crystallization (■) and ZA with  $V_{ZA} = 1.0$  (●), 1.5 (▲), 2.5 (▼) and 3.5 (◆)  $\mu\text{m/s}$ .
